# Supplementary material for: Thrombo-tag, an in vivo formed nanotracer for the detection of thrombi in mice by fast pre-targeted molecular imaging
Source: Royal Society of Chemistry journal article supplement (doi:10.1039/d0nr04538a), 2020-01-01
Supplement: d0nr04538a1.pdf [file d0nr04538a1.pdf]

## Thrombo-tag, an *in vivo* formed nanotracer for the detection of thrombi in mice by fast pre-targeted molecular imaging

José M. Adrover<sup>†</sup>, Juan Pellico<sup>†</sup>, Irene Fernández-Barahona, Sandra Martín-Salamanca, Jesús Ruiz-Cabello, Andrés Hidalgo\* and Fernando Herranz\*.

### Supporting information

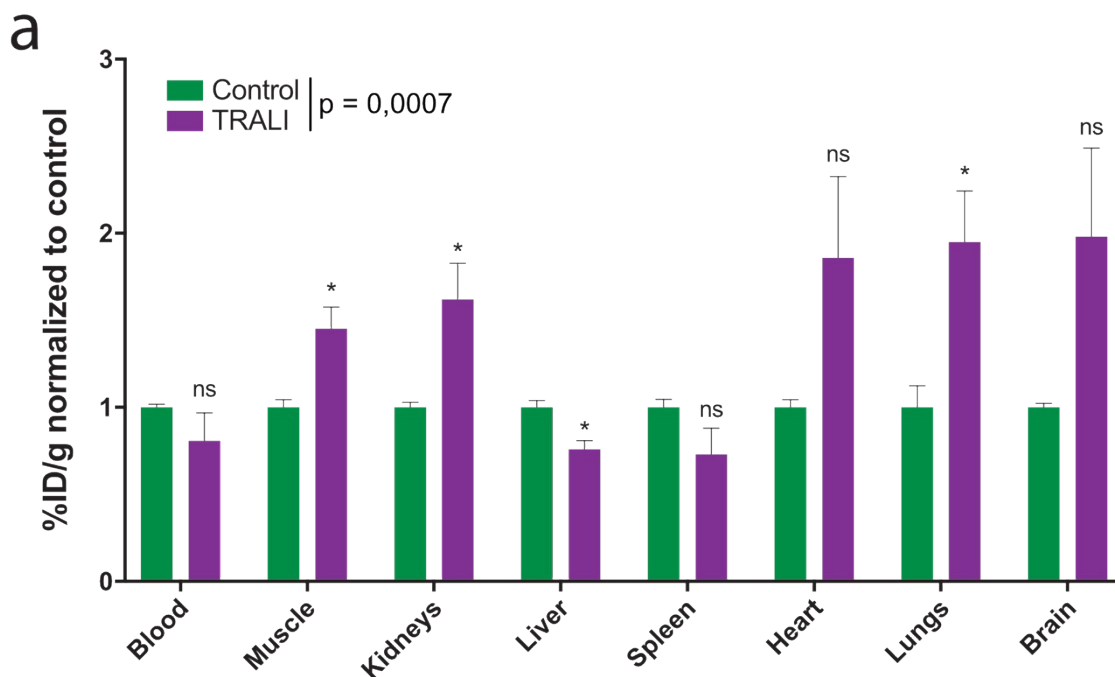

**Figure S1.** Biodistribution of thrombo-tag in several tissues of mice subject to acute lung injury (TRALI) or controls, expressed as the percentage of injected dose per gram of tissue (%ID/g) normalized to control mice.  $n=3$  mice per condition. Bars show mean  $\pm$  s.e.m. \*  $p < 0.05$ ; ns, not significant. Global  $p$ -value (top) as determined by two-way ANOVA. Individual  $p$ -values as determined by unpaired  $t$ -test.

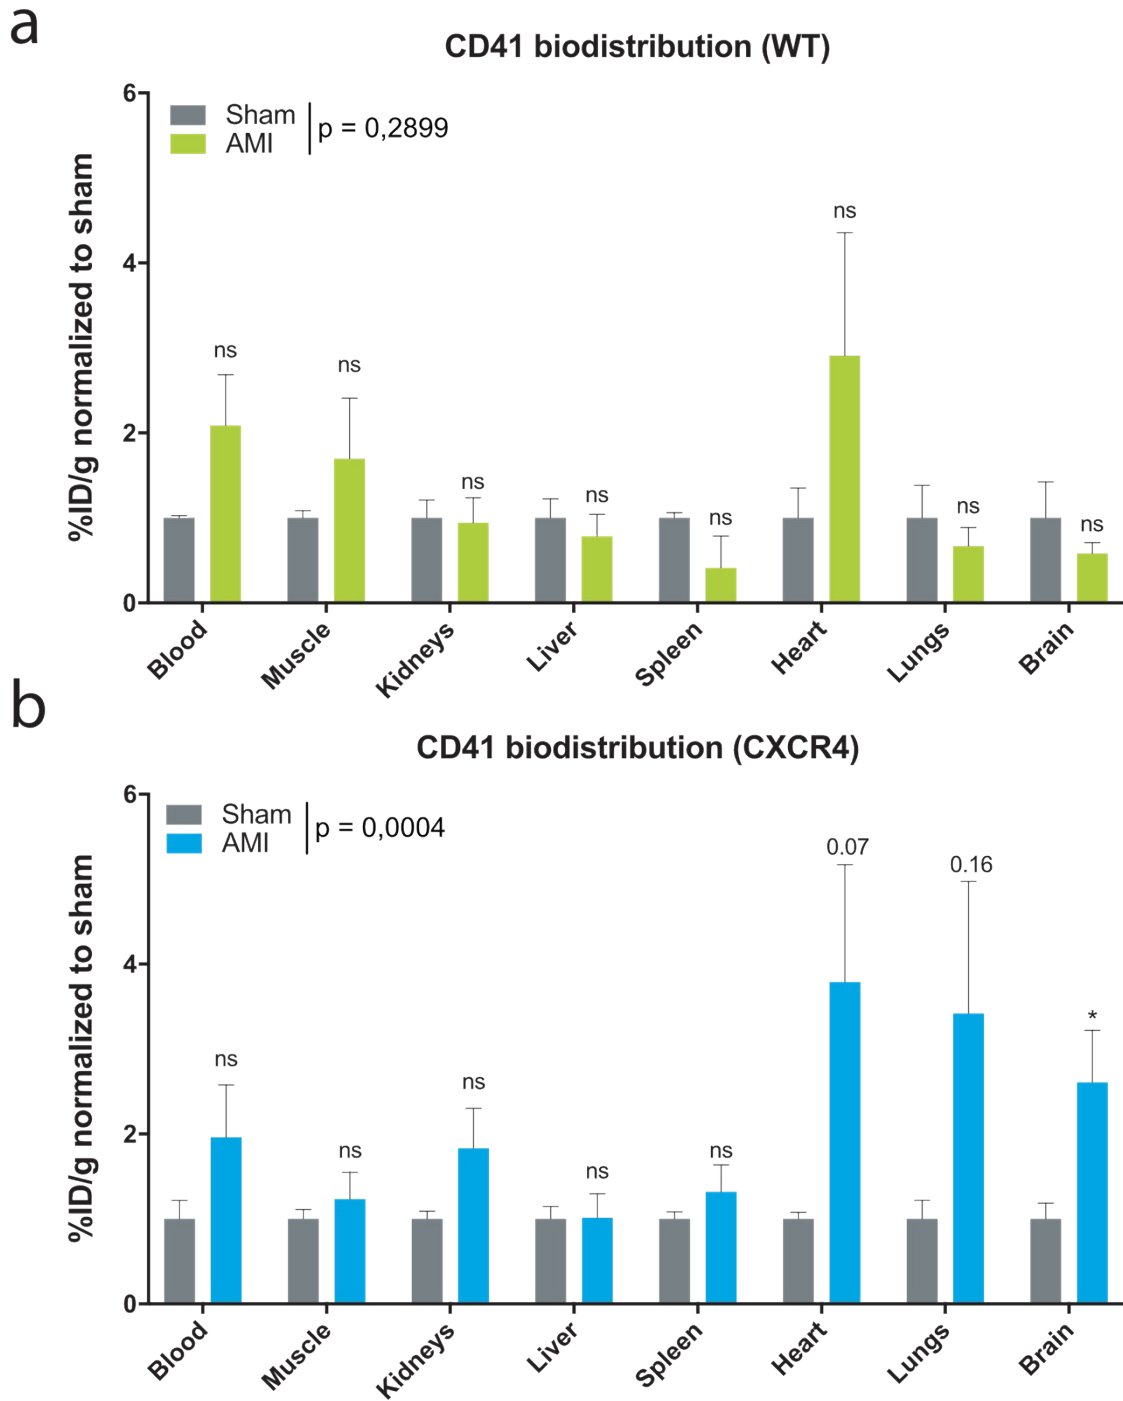

**Figure S2:** Biodistribution of thrombo-tag in several tissues of WT (top) and CXCR4<sup>ΔN</sup> (bottom) mice subject to acute myocardial infarction (AMI) or sham-operated, expressed as the percentage of injected dose per gram of tissue (%ID/g) normalized to sham-operated mice. n=3-5 mice per condition. Bars show mean ± s.e.m. \* p < 0.05; ns, not significant. Global p-value (top) as determined by two-way ANOVA. Individual p-values as determined by unpaired t-test.

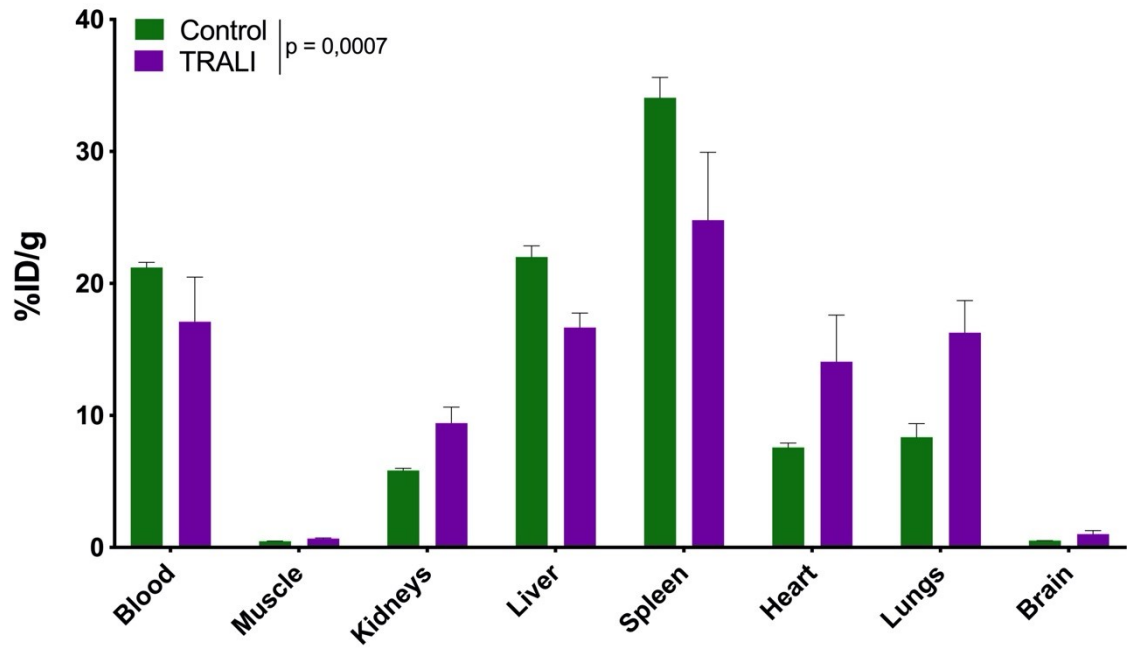

Figure S3. Biodistribution shown in Figure S1 without normalizing to the control value.

### CD41 biodistribution (WT)

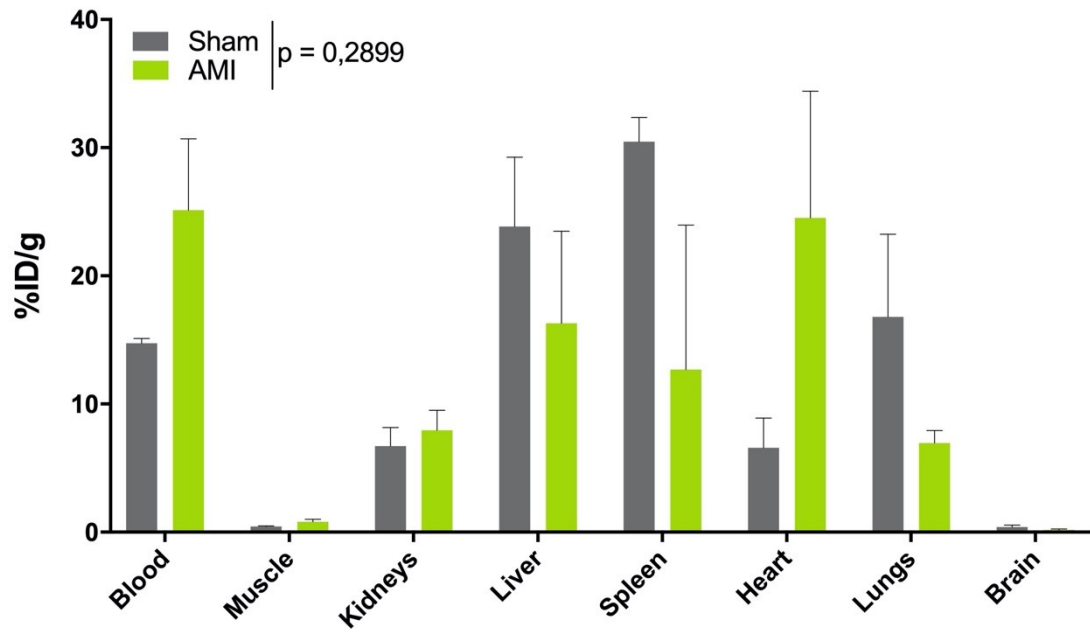

### CD41 biodistribution (CXCR4)

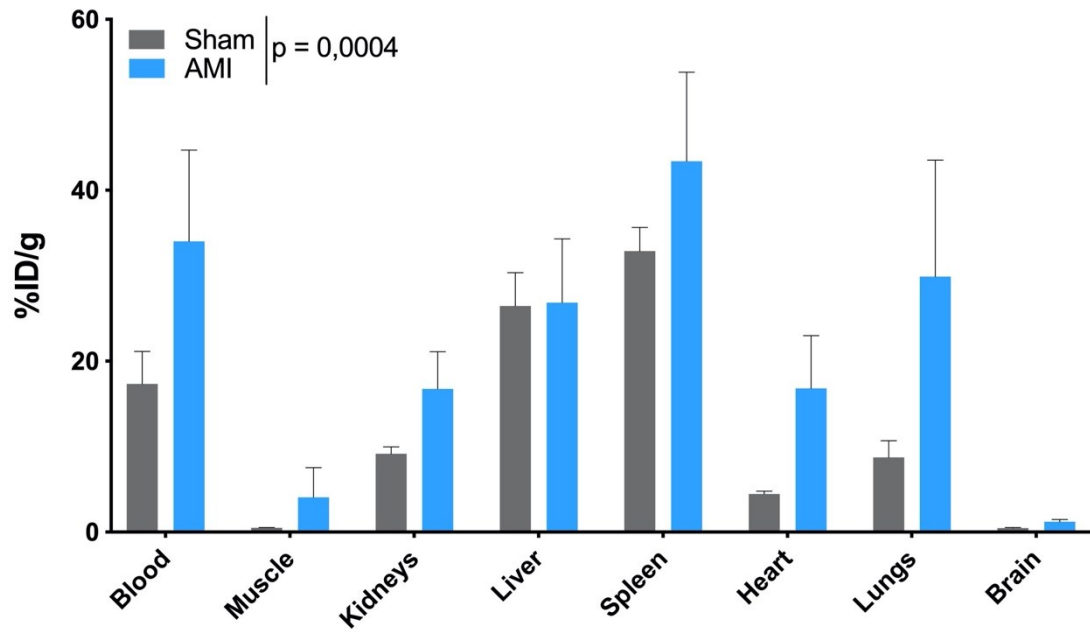

Figure S4. Biodistributions shown in Figure S2 without normalizing to the control value.
